# Supplementary material for: Histological Chorioamnionitis Is Increased at Extremes of Gestation in Stillbirth: A Population-Based Study
Source: Infect Dis Obstet Gynecol. 2011 Jul 19;2011:456728. doi: 10.1155/2011/456728 (PMC3140189; doi:10.1155/2011/456728)
Supplement: Supplementary file 1 — Appendix S1: The New South Wales Midwives Data Collection (MDC) is a population-based surveillance system covering all births in NSW public and private hospitals, as well as home births. It encompasses all live births and stillbirths of at least 20 weeks gestation or at least 400 grams birth weight. Appendix S2: The NSW Maternal and Perinatal Committee is a quality assurance committee established under the NSW Health Administration Act 1982 and is privileged under this Act to carry out confidential reviews of both maternal and perinatal deaths. Information available to the POWP at review is forwarded by hospitals and includes a confidential report on perinatal death (Appendix S2), postmortem, and placental pathology reports as well as any other information considered relevant by the local hospital perinatal death review committee. [file 456728.f1.pdf]

# Appendix S1: Midwives Data Collection

| NSW MIDWIVES DATA COLLECTION                                                                                                                                                                                                                                          |  |  |                                                                                                                                                                                                                                                                    |  |  |  |                                                                                                                                                                  |  |  |                                                                                                                                                                |  |
|-----------------------------------------------------------------------------------------------------------------------------------------------------------------------------------------------------------------------------------------------------------------------|--|--|--------------------------------------------------------------------------------------------------------------------------------------------------------------------------------------------------------------------------------------------------------------------|--|--|--|------------------------------------------------------------------------------------------------------------------------------------------------------------------|--|--|----------------------------------------------------------------------------------------------------------------------------------------------------------------|--|
| Mother Unit<br>Record No. <span style="border: 1px solid black; display: inline-block; width: 100px; height: 1.2em; vertical-align: middle;"></span>                                                                                                                  |  |  | Hospital <span style="border: 1px solid black; display: inline-block; width: 100px; height: 1.2em; vertical-align: middle;"></span> Code <span style="border: 1px solid black; display: inline-block; width: 40px; height: 1.2em; vertical-align: middle;"></span> |  |  |  |                                                                                                                                                                  |  |  |                                                                                                                                                                |  |
| First Name <span style="border: 1px solid black; display: inline-block; width: 100px; height: 1.2em; vertical-align: middle;"></span>                                                                                                                                 |  |  | Family Name <span style="border: 1px solid black; display: inline-block; width: 100px; height: 1.2em; vertical-align: middle;"></span>                                                                                                                             |  |  |  |                                                                                                                                                                  |  |  |                                                                                                                                                                |  |
| Address <span style="border: 1px solid black; display: inline-block; width: 300px; height: 1.2em; vertical-align: middle;"></span> Postcode <span style="border: 1px solid black; display: inline-block; width: 60px; height: 1.2em; vertical-align: middle;"></span> |  |  |                                                                                                                                                                                                                                                                    |  |  |  |                                                                                                                                                                  |  |  |                                                                                                                                                                |  |
| Mother's birth date <span style="border: 1px solid black; display: inline-block; width: 80px; height: 1.2em; vertical-align: middle;"></span>                                                                                                                         |  |  |                                                                                                                                                                                                                                                                    |  |  |  |                                                                                                                                                                  |  |  |                                                                                                                                                                |  |
| Country of birth <span style="border: 1px solid black; display: inline-block; width: 80px; height: 1.2em; vertical-align: middle;"></span>                                                                                                                            |  |  |                                                                                                                                                                                                                                                                    |  |  |  |                                                                                                                                                                  |  |  |                                                                                                                                                                |  |
| If other, specify <span style="border: 1px solid black; display: inline-block; width: 80px; height: 1.2em; vertical-align: middle;"></span>                                                                                                                           |  |  |                                                                                                                                                                                                                                                                    |  |  |  |                                                                                                                                                                  |  |  |                                                                                                                                                                |  |
| Indigenous status: <span style="border: 1px solid black; display: inline-block; width: 80px; height: 1.2em; vertical-align: middle;"></span>                                                                                                                          |  |  |                                                                                                                                                                                                                                                                    |  |  |  |                                                                                                                                                                  |  |  |                                                                                                                                                                |  |
| Aboriginal <input type="checkbox"/> 1                                                                                                                                                                                                                                 |  |  |                                                                                                                                                                                                                                                                    |  |  |  |                                                                                                                                                                  |  |  |                                                                                                                                                                |  |
| Torres Strait Islander <input type="checkbox"/> 2                                                                                                                                                                                                                     |  |  |                                                                                                                                                                                                                                                                    |  |  |  |                                                                                                                                                                  |  |  |                                                                                                                                                                |  |
| Aboriginal and Torres Strait Islander <input type="checkbox"/> 3                                                                                                                                                                                                      |  |  |                                                                                                                                                                                                                                                                    |  |  |  |                                                                                                                                                                  |  |  |                                                                                                                                                                |  |
| None of the above <input type="checkbox"/> 4                                                                                                                                                                                                                          |  |  |                                                                                                                                                                                                                                                                    |  |  |  |                                                                                                                                                                  |  |  |                                                                                                                                                                |  |
| PREVIOUS PREGNANCIES                                                                                                                                                                                                                                                  |  |  | LABOUR AND DELIVERY                                                                                                                                                                                                                                                |  |  |  | BABY                                                                                                                                                             |  |  |                                                                                                                                                                |  |
| Previous pregnancy greater than 20 weeks? Yes <input type="checkbox"/> 1 No <input type="checkbox"/> 0                                                                                                                                                                |  |  | If labour induced, main indication:                                                                                                                                                                                                                                |  |  |  | Place of birth                                                                                                                                                   |  |  |                                                                                                                                                                |  |
| If no, go to next section.                                                                                                                                                                                                                                            |  |  | Diabetes <input type="checkbox"/> 1                                                                                                                                                                                                                                |  |  |  | Hospital theatre/delivery suite <input type="checkbox"/> 1                                                                                                       |  |  |                                                                                                                                                                |  |
| If yes:                                                                                                                                                                                                                                                               |  |  | Hypertensive disease <input type="checkbox"/> 2                                                                                                                                                                                                                    |  |  |  | Birth centre <input type="checkbox"/> 2                                                                                                                          |  |  |                                                                                                                                                                |  |
| Specify the number of previous pregnancies > 20 weeks <span style="border: 1px solid black; display: inline-block; width: 40px; height: 1.2em; vertical-align: middle;"></span>                                                                                       |  |  | Fetal distress <input type="checkbox"/> 3                                                                                                                                                                                                                          |  |  |  | Planned birth centre/delivery suite birth <input type="checkbox"/> 3                                                                                             |  |  |                                                                                                                                                                |  |
| Was the last birth by caesarean? Yes <input type="checkbox"/> 1 No <input type="checkbox"/> 0                                                                                                                                                                         |  |  | Fetal death <input type="checkbox"/> 4                                                                                                                                                                                                                             |  |  |  | Planned homebirth <input type="checkbox"/> 4                                                                                                                     |  |  |                                                                                                                                                                |  |
| Total number of previous caesarean sections? <span style="border: 1px solid black; display: inline-block; width: 40px; height: 1.2em; vertical-align: middle;"></span>                                                                                                |  |  | Chorioamnionitis <input type="checkbox"/> 5                                                                                                                                                                                                                        |  |  |  | Planned homebirth/hospital admission <input type="checkbox"/> 5                                                                                                  |  |  |                                                                                                                                                                |  |
|                                                                                                                                                                                                                                                                       |  |  | Blood group isommunisation <input type="checkbox"/> 6                                                                                                                                                                                                              |  |  |  | Born before arrival <input type="checkbox"/> 6                                                                                                                   |  |  |                                                                                                                                                                |  |
|                                                                                                                                                                                                                                                                       |  |  | Prelabour rupture of membranes <input type="checkbox"/> 7                                                                                                                                                                                                          |  |  |  | Unit Record No. <span style="border: 1px solid black; display: inline-block; width: 80px; height: 1.2em; vertical-align: middle;"></span>                        |  |  |                                                                                                                                                                |  |
|                                                                                                                                                                                                                                                                       |  |  | Prolonged pregnancy (41+ weeks) <input type="checkbox"/> 8                                                                                                                                                                                                         |  |  |  | Birth date: <span style="border: 1px solid black; display: inline-block; width: 80px; height: 1.2em; vertical-align: middle;"></span>                            |  |  |                                                                                                                                                                |  |
|                                                                                                                                                                                                                                                                       |  |  | Suspected intrauterine growth restriction <input type="checkbox"/> 9                                                                                                                                                                                               |  |  |  | Sex: M <input type="checkbox"/> 1 F <input type="checkbox"/> 2 Indet. <input type="checkbox"/> 3                                                                 |  |  |                                                                                                                                                                |  |
|                                                                                                                                                                                                                                                                       |  |  | Other <input type="checkbox"/> 10                                                                                                                                                                                                                                  |  |  |  | Plurality: Single <input type="checkbox"/> 1 Multiple <input type="checkbox"/> 2                                                                                 |  |  |                                                                                                                                                                |  |
|                                                                                                                                                                                                                                                                       |  |  | Pain relief/ anaesthetics (tick 1 or more)                                                                                                                                                                                                                         |  |  |  | If multiple, total number <span style="border: 1px solid black; display: inline-block; width: 40px; height: 1.2em; vertical-align: middle;"></span>              |  |  |                                                                                                                                                                |  |
|                                                                                                                                                                                                                                                                       |  |  | None <input type="checkbox"/> Pudendal <input type="checkbox"/>                                                                                                                                                                                                    |  |  |  | If multiple birth, specify baby number <span style="border: 1px solid black; display: inline-block; width: 40px; height: 1.2em; vertical-align: middle;"></span> |  |  |                                                                                                                                                                |  |
|                                                                                                                                                                                                                                                                       |  |  | Nitrous oxide <input type="checkbox"/> Spinal <input type="checkbox"/>                                                                                                                                                                                             |  |  |  | Birthweight (grams) <span style="border: 1px solid black; display: inline-block; width: 80px; height: 1.2em; vertical-align: middle;"></span>                    |  |  |                                                                                                                                                                |  |
|                                                                                                                                                                                                                                                                       |  |  | IM narcotics <input type="checkbox"/> General anaesthetic <input type="checkbox"/>                                                                                                                                                                                 |  |  |  | Estimated gestational age <span style="border: 1px solid black; display: inline-block; width: 80px; height: 1.2em; vertical-align: middle;"></span>              |  |  |                                                                                                                                                                |  |
|                                                                                                                                                                                                                                                                       |  |  | Local to perineum <input type="checkbox"/> Other <input type="checkbox"/>                                                                                                                                                                                          |  |  |  | Apgar <span style="border: 1px solid black; display: inline-block; width: 80px; height: 1.2em; vertical-align: middle;"></span>                                  |  |  |                                                                                                                                                                |  |
|                                                                                                                                                                                                                                                                       |  |  | Epidural/caudal <input type="checkbox"/>                                                                                                                                                                                                                           |  |  |  | 1 min 5 min                                                                                                                                                      |  |  |                                                                                                                                                                |  |
|                                                                                                                                                                                                                                                                       |  |  | Presentation at birth                                                                                                                                                                                                                                              |  |  |  | Resuscitation of baby (tick 1 or more)                                                                                                                           |  |  |                                                                                                                                                                |  |
|                                                                                                                                                                                                                                                                       |  |  | Vertex <input type="checkbox"/> 1 Face <input type="checkbox"/> 3                                                                                                                                                                                                  |  |  |  | None <input type="checkbox"/> 1 IPPR: bag + mask <input type="checkbox"/> 4                                                                                      |  |  |                                                                                                                                                                |  |
|                                                                                                                                                                                                                                                                       |  |  | Breech <input type="checkbox"/> 2 Brow <input type="checkbox"/> 4                                                                                                                                                                                                  |  |  |  | Suction <input type="checkbox"/> 2 Intubation + IPPR <input type="checkbox"/> 5                                                                                  |  |  |                                                                                                                                                                |  |
|                                                                                                                                                                                                                                                                       |  |  | Other <input type="checkbox"/> 5                                                                                                                                                                                                                                   |  |  |  | O2 therapy <input type="checkbox"/> 3 External cardiac massage + ventilation <input type="checkbox"/> 6                                                          |  |  |                                                                                                                                                                |  |
|                                                                                                                                                                                                                                                                       |  |  | Type of delivery                                                                                                                                                                                                                                                   |  |  |  | Other <input type="checkbox"/> 7                                                                                                                                 |  |  |                                                                                                                                                                |  |
|                                                                                                                                                                                                                                                                       |  |  | Normal vaginal <input type="checkbox"/> 1 Vacuum extr. <input type="checkbox"/> 3                                                                                                                                                                                  |  |  |  |                                                                                                                                                                  |  |  |                                                                                                                                                                |  |
|                                                                                                                                                                                                                                                                       |  |  | Forceps <input type="checkbox"/> 2 Vaginal breech <input type="checkbox"/> 4                                                                                                                                                                                       |  |  |  |                                                                                                                                                                  |  |  |                                                                                                                                                                |  |
|                                                                                                                                                                                                                                                                       |  |  | Caesarean section <input type="checkbox"/> 5                                                                                                                                                                                                                       |  |  |  |                                                                                                                                                                  |  |  |                                                                                                                                                                |  |
|                                                                                                                                                                                                                                                                       |  |  | If caesarean section, main indication:                                                                                                                                                                                                                             |  |  |  |                                                                                                                                                                  |  |  |                                                                                                                                                                |  |
|                                                                                                                                                                                                                                                                       |  |  | Failure to progress                                                                                                                                                                                                                                                |  |  |  |                                                                                                                                                                  |  |  |                                                                                                                                                                |  |
|                                                                                                                                                                                                                                                                       |  |  | - Cx dilatation unknown <input type="checkbox"/> 1                                                                                                                                                                                                                 |  |  |  |                                                                                                                                                                  |  |  |                                                                                                                                                                |  |
|                                                                                                                                                                                                                                                                       |  |  | - Cx 3cm dilated or less <input type="checkbox"/> 2                                                                                                                                                                                                                |  |  |  |                                                                                                                                                                  |  |  |                                                                                                                                                                |  |
|                                                                                                                                                                                                                                                                       |  |  | - Cx dilated more than 3 cm <input type="checkbox"/> 3                                                                                                                                                                                                             |  |  |  |                                                                                                                                                                  |  |  |                                                                                                                                                                |  |
|                                                                                                                                                                                                                                                                       |  |  | Fetal distress <input type="checkbox"/> 4                                                                                                                                                                                                                          |  |  |  |                                                                                                                                                                  |  |  |                                                                                                                                                                |  |
|                                                                                                                                                                                                                                                                       |  |  | Other <input type="checkbox"/> 5                                                                                                                                                                                                                                   |  |  |  |                                                                                                                                                                  |  |  |                                                                                                                                                                |  |
|                                                                                                                                                                                                                                                                       |  |  | Perineal status                                                                                                                                                                                                                                                    |  |  |  |                                                                                                                                                                  |  |  |                                                                                                                                                                |  |
|                                                                                                                                                                                                                                                                       |  |  | Intact <input type="checkbox"/> 1 4th deg. tear <input type="checkbox"/> 5                                                                                                                                                                                         |  |  |  |                                                                                                                                                                  |  |  |                                                                                                                                                                |  |
|                                                                                                                                                                                                                                                                       |  |  | 1st deg. tear/gaze <input type="checkbox"/> 2 Episiotomy <input type="checkbox"/> 6                                                                                                                                                                                |  |  |  |                                                                                                                                                                  |  |  |                                                                                                                                                                |  |
|                                                                                                                                                                                                                                                                       |  |  | 2nd deg. tear <input type="checkbox"/> 3 Both tear and episiotomy <input type="checkbox"/> 7                                                                                                                                                                       |  |  |  |                                                                                                                                                                  |  |  |                                                                                                                                                                |  |
|                                                                                                                                                                                                                                                                       |  |  | 3rd deg. tear <input type="checkbox"/> 4 Other <input type="checkbox"/> 8                                                                                                                                                                                          |  |  |  |                                                                                                                                                                  |  |  |                                                                                                                                                                |  |
|                                                                                                                                                                                                                                                                       |  |  | Surgical repair of the vagina or perineum? Yes <input type="checkbox"/> 1 No <input type="checkbox"/> 0                                                                                                                                                            |  |  |  |                                                                                                                                                                  |  |  |                                                                                                                                                                |  |
|                                                                                                                                                                                                                                                                       |  |  |                                                                                                                                                                                                                                                                    |  |  |  |                                                                                                                                                                  |  |  |                                                                                                                                                                |  |
| THIS PREGNANCY                                                                                                                                                                                                                                                        |  |  | POSTNATAL CARE - BABY                                                                                                                                                                                                                                              |  |  |  |                                                                                                                                                                  |  |  |                                                                                                                                                                |  |
| Date of LMP <span style="border: 1px solid black; display: inline-block; width: 80px; height: 1.2em; vertical-align: middle;"></span>                                                                                                                                 |  |  | Birth defect? Yes <input type="checkbox"/> 1 No <input type="checkbox"/> 0                                                                                                                                                                                         |  |  |  |                                                                                                                                                                  |  |  |                                                                                                                                                                |  |
| Prenatal diagnosis (< 20 weeks gestation) CVS <input type="checkbox"/>                                                                                                                                                                                                |  |  | If yes, specify:                                                                                                                                                                                                                                                   |  |  |  |                                                                                                                                                                  |  |  |                                                                                                                                                                |  |
| Amniocentesis <input type="checkbox"/>                                                                                                                                                                                                                                |  |  |                                                                                                                                                                                                                                                                    |  |  |  |                                                                                                                                                                  |  |  |                                                                                                                                                                |  |
| Antenatal care                                                                                                                                                                                                                                                        |  |  | Admitted to NICU? Yes <input type="checkbox"/> 1 No <input type="checkbox"/> 0                                                                                                                                                                                     |  |  |  |                                                                                                                                                                  |  |  |                                                                                                                                                                |  |
| Duration of pregnancy at first visit (weeks) <span style="border: 1px solid black; display: inline-block; width: 40px; height: 1.2em; vertical-align: middle;"></span>                                                                                                |  |  | Admitted to SCN? Yes <input type="checkbox"/> 1 No <input type="checkbox"/> 0                                                                                                                                                                                      |  |  |  |                                                                                                                                                                  |  |  |                                                                                                                                                                |  |
| Not booked <input type="checkbox"/>                                                                                                                                                                                                                                   |  |  | If yes, observation only? Yes <input type="checkbox"/> 1 No <input type="checkbox"/> 0                                                                                                                                                                             |  |  |  |                                                                                                                                                                  |  |  |                                                                                                                                                                |  |
| Medical conditions                                                                                                                                                                                                                                                    |  |  | If admitted to SCN/NICU:                                                                                                                                                                                                                                           |  |  |  |                                                                                                                                                                  |  |  |                                                                                                                                                                |  |
| Diabetes mellitus <input type="checkbox"/>                                                                                                                                                                                                                            |  |  | Was a birth defect the main reason for admission? Yes <input type="checkbox"/> 1 No <input type="checkbox"/> 0                                                                                                                                                     |  |  |  |                                                                                                                                                                  |  |  |                                                                                                                                                                |  |
| Gestational diabetes <input type="checkbox"/>                                                                                                                                                                                                                         |  |  |                                                                                                                                                                                                                                                                    |  |  |  |                                                                                                                                                                  |  |  |                                                                                                                                                                |  |
| Chronic hypertension <input type="checkbox"/>                                                                                                                                                                                                                         |  |  |                                                                                                                                                                                                                                                                    |  |  |  |                                                                                                                                                                  |  |  |                                                                                                                                                                |  |
| Pre-eclampsia <input type="checkbox"/>                                                                                                                                                                                                                                |  |  |                                                                                                                                                                                                                                                                    |  |  |  |                                                                                                                                                                  |  |  |                                                                                                                                                                |  |
| Smoking                                                                                                                                                                                                                                                               |  |  |                                                                                                                                                                                                                                                                    |  |  |  |                                                                                                                                                                  |  |  |                                                                                                                                                                |  |
| Did the mother smoke at all during pregnancy? Yes <input type="checkbox"/> 1 No <input type="checkbox"/> 0                                                                                                                                                            |  |  |                                                                                                                                                                                                                                                                    |  |  |  |                                                                                                                                                                  |  |  |                                                                                                                                                                |  |
| If yes, how many cigarettes each day on average in the second half of pregnancy?                                                                                                                                                                                      |  |  |                                                                                                                                                                                                                                                                    |  |  |  |                                                                                                                                                                  |  |  |                                                                                                                                                                |  |
| None <input type="checkbox"/> 1 > 10 per day <input type="checkbox"/> 2                                                                                                                                                                                               |  |  |                                                                                                                                                                                                                                                                    |  |  |  |                                                                                                                                                                  |  |  |                                                                                                                                                                |  |
| ≤ 10 per day <input type="checkbox"/> 3 Unknown <input type="checkbox"/> 4                                                                                                                                                                                            |  |  |                                                                                                                                                                                                                                                                    |  |  |  |                                                                                                                                                                  |  |  |                                                                                                                                                                |  |
| LABOUR AND DELIVERY                                                                                                                                                                                                                                                   |  |  | DISCHARGE STATUS - MOTHER AND BABY                                                                                                                                                                                                                                 |  |  |  |                                                                                                                                                                  |  |  |                                                                                                                                                                |  |
| Onset of labour                                                                                                                                                                                                                                                       |  |  | Mother                                                                                                                                                                                                                                                             |  |  |  | Baby                                                                                                                                                             |  |  | Baby's date of discharge or transfer <span style="border: 1px solid black; display: inline-block; width: 80px; height: 1.2em; vertical-align: middle;"></span> |  |
| Spontaneous <input type="checkbox"/> 1 Induced <input type="checkbox"/> 2                                                                                                                                                                                             |  |  | Discharged <input type="checkbox"/> 1                                                                                                                                                                                                                              |  |  |  | Discharged <input type="checkbox"/> 1                                                                                                                            |  |  | day month year                                                                                                                                                 |  |
| No labour <input type="checkbox"/> 3                                                                                                                                                                                                                                  |  |  | Transferred <input type="checkbox"/> 2                                                                                                                                                                                                                             |  |  |  | Transferred <input type="checkbox"/> 2                                                                                                                           |  |  | Hospital transferred to: <span style="border: 1px solid black; display: inline-block; width: 80px; height: 1.2em; vertical-align: middle;"></span>             |  |
| If labour augmented/ induced (tick 1 or more):                                                                                                                                                                                                                        |  |  | Died <input type="checkbox"/> 3                                                                                                                                                                                                                                    |  |  |  | Stillbirth <input type="checkbox"/> 3                                                                                                                            |  |  | If baby died, date of death <span style="border: 1px solid black; display: inline-block; width: 80px; height: 1.2em; vertical-align: middle;"></span>          |  |
| Oxytocins <input type="checkbox"/> ARM <input type="checkbox"/>                                                                                                                                                                                                       |  |  |                                                                                                                                                                                                                                                                    |  |  |  | Neonatal death <input type="checkbox"/> 4                                                                                                                        |  |  | day month year                                                                                                                                                 |  |
| Prostaglandins <input type="checkbox"/> Other <input type="checkbox"/>                                                                                                                                                                                                |  |  |                                                                                                                                                                                                                                                                    |  |  |  | Transferred and died <input type="checkbox"/> 5                                                                                                                  |  |  | Signature of midwife at discharge <span style="border: 1px solid black; display: inline-block; width: 80px; height: 1.2em; vertical-align: middle;"></span>    |  |

Health Department Copy

Please complete and forward to: NSW Midwives Data Collection  
Patient Data Management Unit, Level 6  
Locked Bag 961, North Sydney, NSW 2059

## ✓

Page 1

| PART A (continued)                                                                                                                                                                                                                                                                                                                                                                                                                                                                                                                                                                                                                                                                                                                                                                                                                                                                                                                                                                                                                                                                                                                                                                                                                                                                                                                                                                                                                                                                                                                                                                                                                                                                                                                                                                                                                                                                                                                                                                                                                                                                                                                                                                                                                                                                                                                                                                                                                                                                        | PART B (Neonatal deaths only)                                                                                                                                                                                                                                                                                                                                                                                                                                                                                                                                                                                                                                                                                                                                                                                                                                                                                                                                                                                                                                                                                                                                                                                                                                                                                                                                                                                                                                                                                                                                                                                                                                                                                                                                                                                                                                                                                                                                                                                                                                                                                                                                                                                                                                                                                                                                                                                                                                                                                                                | MAIN CAUSE OF DEATH AND RELEVANT FACTORS                                                                                                                                                                                                                                                                                                                                                                                                                                                                                                                                                                                                                                                                                                                                                                                                                                                                                                                                                                                                                                                                                                                                                                                                                                                                                                                                                                                                                                                                                                                                                                                                                                                                                                                                                                                                                                  |                   |                     |                        |    |     |     |    |     |     |    |     |     |    |     |     |    |     |     |    |     |     |    |     |     |    |     |     |    |      |      |    |      |      |    |      |      |    |      |      |    |      |      |    |      |      |    |      |      |    |      |      |    |      |      |    |      |      |    |      |      |    |      |      |    |      |      |    |      |      |    |      |      |
|-------------------------------------------------------------------------------------------------------------------------------------------------------------------------------------------------------------------------------------------------------------------------------------------------------------------------------------------------------------------------------------------------------------------------------------------------------------------------------------------------------------------------------------------------------------------------------------------------------------------------------------------------------------------------------------------------------------------------------------------------------------------------------------------------------------------------------------------------------------------------------------------------------------------------------------------------------------------------------------------------------------------------------------------------------------------------------------------------------------------------------------------------------------------------------------------------------------------------------------------------------------------------------------------------------------------------------------------------------------------------------------------------------------------------------------------------------------------------------------------------------------------------------------------------------------------------------------------------------------------------------------------------------------------------------------------------------------------------------------------------------------------------------------------------------------------------------------------------------------------------------------------------------------------------------------------------------------------------------------------------------------------------------------------------------------------------------------------------------------------------------------------------------------------------------------------------------------------------------------------------------------------------------------------------------------------------------------------------------------------------------------------------------------------------------------------------------------------------------------------|----------------------------------------------------------------------------------------------------------------------------------------------------------------------------------------------------------------------------------------------------------------------------------------------------------------------------------------------------------------------------------------------------------------------------------------------------------------------------------------------------------------------------------------------------------------------------------------------------------------------------------------------------------------------------------------------------------------------------------------------------------------------------------------------------------------------------------------------------------------------------------------------------------------------------------------------------------------------------------------------------------------------------------------------------------------------------------------------------------------------------------------------------------------------------------------------------------------------------------------------------------------------------------------------------------------------------------------------------------------------------------------------------------------------------------------------------------------------------------------------------------------------------------------------------------------------------------------------------------------------------------------------------------------------------------------------------------------------------------------------------------------------------------------------------------------------------------------------------------------------------------------------------------------------------------------------------------------------------------------------------------------------------------------------------------------------------------------------------------------------------------------------------------------------------------------------------------------------------------------------------------------------------------------------------------------------------------------------------------------------------------------------------------------------------------------------------------------------------------------------------------------------------------------------|---------------------------------------------------------------------------------------------------------------------------------------------------------------------------------------------------------------------------------------------------------------------------------------------------------------------------------------------------------------------------------------------------------------------------------------------------------------------------------------------------------------------------------------------------------------------------------------------------------------------------------------------------------------------------------------------------------------------------------------------------------------------------------------------------------------------------------------------------------------------------------------------------------------------------------------------------------------------------------------------------------------------------------------------------------------------------------------------------------------------------------------------------------------------------------------------------------------------------------------------------------------------------------------------------------------------------------------------------------------------------------------------------------------------------------------------------------------------------------------------------------------------------------------------------------------------------------------------------------------------------------------------------------------------------------------------------------------------------------------------------------------------------------------------------------------------------------------------------------------------------|-------------------|---------------------|------------------------|----|-----|-----|----|-----|-----|----|-----|-----|----|-----|-----|----|-----|-----|----|-----|-----|----|-----|-----|----|-----|-----|----|------|------|----|------|------|----|------|------|----|------|------|----|------|------|----|------|------|----|------|------|----|------|------|----|------|------|----|------|------|----|------|------|----|------|------|----|------|------|----|------|------|----|------|------|
| <p>17. Were there cord complications?<br/>           Yes <input type="checkbox"/> No <input type="checkbox"/> Unknown <input type="checkbox"/><br/>           If yes, describe: _____</p> <p>18. Was a major fetal abnormality present?<br/>           Yes <input type="checkbox"/> No <input type="checkbox"/> Unknown <input type="checkbox"/><br/>           If yes, describe: _____</p> <p>19. Was chorioamnionitis present?<br/>           Yes <input type="checkbox"/> No <input type="checkbox"/> Unknown <input type="checkbox"/><br/>           If yes, diagnosis was:<br/>               Pathological <input type="checkbox"/><br/>               Clinical <input type="checkbox"/><br/>           If yes, specify organism: _____</p> <p>20. Infant/ fetal infection?<br/>           Yes <input type="checkbox"/> No <input type="checkbox"/> Unknown <input type="checkbox"/><br/>           If yes: <input type="checkbox"/> Streptococcus Group B<br/>                   <input type="checkbox"/> E Coli<br/>                   <input type="checkbox"/> Listeria monocytogenes<br/>                   <input type="checkbox"/> Cytomegalovirus<br/>                   <input type="checkbox"/> Parvovirus<br/>                   <input type="checkbox"/> Herpes simplex virus<br/>                   <input type="checkbox"/> Rubella virus<br/>                   <input type="checkbox"/> Toxoplasma<br/>                   <input type="checkbox"/> Syphilis<br/>                   <input type="checkbox"/> Other<br/>           If other, specify: _____</p> <p>21. Other conditions?<br/>           Yes <input type="checkbox"/> No <input type="checkbox"/> Unknown <input type="checkbox"/><br/>           If yes: <input type="checkbox"/> Twin-to-twin transfusion<br/>                   <input type="checkbox"/> Fetomaternal haemorrhage<br/>                   <input type="checkbox"/> Uterine abnormality<br/>                   <input type="checkbox"/> Birth trauma<br/>                   <input type="checkbox"/> Haemolytic disease<br/>                   <input type="checkbox"/> Idiopathic hydrops<br/>                   <input type="checkbox"/> Drug dependence/abuse<br/>                   <input type="checkbox"/> Termination of pregnancy<br/>                   <input type="checkbox"/> Other<br/>           If other, specify: _____</p> <p>22. Classification of obstetric cause of death (see Attachment)<br/>           _____</p> | <p>THE MAIN CAUSE OF DEATH (tick one):</p> <p>1. Congenital abnormality <input type="checkbox"/></p> <p>2. Extreme prematurity <input type="checkbox"/><br/>           If yes, was resuscitation carried out?<br/>           Yes <input type="checkbox"/> No <input type="checkbox"/> Unknown <input type="checkbox"/></p> <p>3. Cardio-respiratory <input type="checkbox"/><br/>               Hyaline membrane disease <input type="checkbox"/><br/>               Meconium aspiration syndrome <input type="checkbox"/><br/>               Primary persistent pulmonary hypertension <input type="checkbox"/><br/>               Pulmonary hypoplasia <input type="checkbox"/><br/>               Chronic neonatal lung disease <input type="checkbox"/><br/>               Other <input type="checkbox"/><br/>           If other, specify: _____</p> <p>4. Infection <input type="checkbox"/><br/>               Congenital bacterial <input type="checkbox"/><br/>               Acquired bacterial <input type="checkbox"/><br/>               Congenital viral <input type="checkbox"/><br/>               Acquired viral <input type="checkbox"/><br/>               Protozoal eg Toxoplasma <input type="checkbox"/><br/>               Spirochaetal eg Syphilis <input type="checkbox"/><br/>               Fungal <input type="checkbox"/><br/>               Other <input type="checkbox"/><br/>           If other, specify: _____</p> <p>5. Neurological <input type="checkbox"/><br/>               Hypoxic ischaemic encephalopathy/perinatal asphyxia <input type="checkbox"/><br/>               Intracranial haemorrhage <input type="checkbox"/><br/>               Other <input type="checkbox"/><br/>           If other, specify: _____</p> <p>6. Gastrointestinal <input type="checkbox"/><br/>               Necrotising enterocolitis <input type="checkbox"/><br/>               Other <input type="checkbox"/><br/>           If other, specify: _____</p> <p>7. Other <input type="checkbox"/><br/>               SIDS: <input type="checkbox"/><br/>                   Consistent with SIDS <input type="checkbox"/><br/>                   Possible SIDS <input type="checkbox"/><br/>               Multisystem failure (only if unknown primary cause or trigger event) <input type="checkbox"/><br/>               Trauma <input type="checkbox"/><br/>               Undetermined <input type="checkbox"/><br/>               Other <input type="checkbox"/><br/>           If other, specify: _____</p> | <p>Main cause of death as determined by hospital perinatal death review committee</p> <hr/> <p>Relevant factors:</p> <p>Antenatal: _____</p> <p>Intrapartum: _____</p> <p>Postpartum: _____</p> <p>Form completed by:<br/>           Name: _____</p> <p>Date: ____/____/____</p> <p><b>DEFINITION: FETAL GROWTH RESTRICTION</b><br/>           Less than the 10th percentile for gestation.</p> <table border="1" style="width: 100%; border-collapse: collapse;"> <thead> <tr> <th>Gestation (weeks)</th> <th>Weight (grams) Male</th> <th>10th percentile Female</th> </tr> </thead> <tbody> <tr><td>22</td><td>400</td><td>400</td></tr> <tr><td>23</td><td>500</td><td>470</td></tr> <tr><td>24</td><td>520</td><td>540</td></tr> <tr><td>25</td><td>620</td><td>620</td></tr> <tr><td>26</td><td>720</td><td>680</td></tr> <tr><td>27</td><td>740</td><td>730</td></tr> <tr><td>28</td><td>850</td><td>760</td></tr> <tr><td>29</td><td>950</td><td>890</td></tr> <tr><td>30</td><td>1080</td><td>1045</td></tr> <tr><td>31</td><td>1310</td><td>1140</td></tr> <tr><td>32</td><td>1400</td><td>1340</td></tr> <tr><td>33</td><td>1640</td><td>1520</td></tr> <tr><td>34</td><td>1840</td><td>1760</td></tr> <tr><td>35</td><td>2110</td><td>2030</td></tr> <tr><td>36</td><td>2320</td><td>2220</td></tr> <tr><td>37</td><td>2550</td><td>2430</td></tr> <tr><td>38</td><td>2780</td><td>2660</td></tr> <tr><td>39</td><td>2940</td><td>2820</td></tr> <tr><td>40</td><td>3070</td><td>2950</td></tr> <tr><td>41</td><td>3180</td><td>3050</td></tr> <tr><td>42</td><td>3210</td><td>3080</td></tr> <tr><td>43</td><td>3080</td><td>2950</td></tr> <tr><td>44</td><td>3050</td><td>2930</td></tr> </tbody> </table> <p>Source: Roberts CL, Lancaster PAL. Australian national birthweight percentiles by gestational age. <i>Med J Aust</i> 1999; 170: 114-118.</p> | Gestation (weeks) | Weight (grams) Male | 10th percentile Female | 22 | 400 | 400 | 23 | 500 | 470 | 24 | 520 | 540 | 25 | 620 | 620 | 26 | 720 | 680 | 27 | 740 | 730 | 28 | 850 | 760 | 29 | 950 | 890 | 30 | 1080 | 1045 | 31 | 1310 | 1140 | 32 | 1400 | 1340 | 33 | 1640 | 1520 | 34 | 1840 | 1760 | 35 | 2110 | 2030 | 36 | 2320 | 2220 | 37 | 2550 | 2430 | 38 | 2780 | 2660 | 39 | 2940 | 2820 | 40 | 3070 | 2950 | 41 | 3180 | 3050 | 42 | 3210 | 3080 | 43 | 3080 | 2950 | 44 | 3050 | 2930 |
| Gestation (weeks)                                                                                                                                                                                                                                                                                                                                                                                                                                                                                                                                                                                                                                                                                                                                                                                                                                                                                                                                                                                                                                                                                                                                                                                                                                                                                                                                                                                                                                                                                                                                                                                                                                                                                                                                                                                                                                                                                                                                                                                                                                                                                                                                                                                                                                                                                                                                                                                                                                                                         | Weight (grams) Male                                                                                                                                                                                                                                                                                                                                                                                                                                                                                                                                                                                                                                                                                                                                                                                                                                                                                                                                                                                                                                                                                                                                                                                                                                                                                                                                                                                                                                                                                                                                                                                                                                                                                                                                                                                                                                                                                                                                                                                                                                                                                                                                                                                                                                                                                                                                                                                                                                                                                                                          | 10th percentile Female                                                                                                                                                                                                                                                                                                                                                                                                                                                                                                                                                                                                                                                                                                                                                                                                                                                                                                                                                                                                                                                                                                                                                                                                                                                                                                                                                                                                                                                                                                                                                                                                                                                                                                                                                                                                                                                    |                   |                     |                        |    |     |     |    |     |     |    |     |     |    |     |     |    |     |     |    |     |     |    |     |     |    |     |     |    |      |      |    |      |      |    |      |      |    |      |      |    |      |      |    |      |      |    |      |      |    |      |      |    |      |      |    |      |      |    |      |      |    |      |      |    |      |      |    |      |      |    |      |      |
| 22                                                                                                                                                                                                                                                                                                                                                                                                                                                                                                                                                                                                                                                                                                                                                                                                                                                                                                                                                                                                                                                                                                                                                                                                                                                                                                                                                                                                                                                                                                                                                                                                                                                                                                                                                                                                                                                                                                                                                                                                                                                                                                                                                                                                                                                                                                                                                                                                                                                                                        | 400                                                                                                                                                                                                                                                                                                                                                                                                                                                                                                                                                                                                                                                                                                                                                                                                                                                                                                                                                                                                                                                                                                                                                                                                                                                                                                                                                                                                                                                                                                                                                                                                                                                                                                                                                                                                                                                                                                                                                                                                                                                                                                                                                                                                                                                                                                                                                                                                                                                                                                                                          | 400                                                                                                                                                                                                                                                                                                                                                                                                                                                                                                                                                                                                                                                                                                                                                                                                                                                                                                                                                                                                                                                                                                                                                                                                                                                                                                                                                                                                                                                                                                                                                                                                                                                                                                                                                                                                                                                                       |                   |                     |                        |    |     |     |    |     |     |    |     |     |    |     |     |    |     |     |    |     |     |    |     |     |    |     |     |    |      |      |    |      |      |    |      |      |    |      |      |    |      |      |    |      |      |    |      |      |    |      |      |    |      |      |    |      |      |    |      |      |    |      |      |    |      |      |    |      |      |    |      |      |
| 23                                                                                                                                                                                                                                                                                                                                                                                                                                                                                                                                                                                                                                                                                                                                                                                                                                                                                                                                                                                                                                                                                                                                                                                                                                                                                                                                                                                                                                                                                                                                                                                                                                                                                                                                                                                                                                                                                                                                                                                                                                                                                                                                                                                                                                                                                                                                                                                                                                                                                        | 500                                                                                                                                                                                                                                                                                                                                                                                                                                                                                                                                                                                                                                                                                                                                                                                                                                                                                                                                                                                                                                                                                                                                                                                                                                                                                                                                                                                                                                                                                                                                                                                                                                                                                                                                                                                                                                                                                                                                                                                                                                                                                                                                                                                                                                                                                                                                                                                                                                                                                                                                          | 470                                                                                                                                                                                                                                                                                                                                                                                                                                                                                                                                                                                                                                                                                                                                                                                                                                                                                                                                                                                                                                                                                                                                                                                                                                                                                                                                                                                                                                                                                                                                                                                                                                                                                                                                                                                                                                                                       |                   |                     |                        |    |     |     |    |     |     |    |     |     |    |     |     |    |     |     |    |     |     |    |     |     |    |     |     |    |      |      |    |      |      |    |      |      |    |      |      |    |      |      |    |      |      |    |      |      |    |      |      |    |      |      |    |      |      |    |      |      |    |      |      |    |      |      |    |      |      |    |      |      |
| 24                                                                                                                                                                                                                                                                                                                                                                                                                                                                                                                                                                                                                                                                                                                                                                                                                                                                                                                                                                                                                                                                                                                                                                                                                                                                                                                                                                                                                                                                                                                                                                                                                                                                                                                                                                                                                                                                                                                                                                                                                                                                                                                                                                                                                                                                                                                                                                                                                                                                                        | 520                                                                                                                                                                                                                                                                                                                                                                                                                                                                                                                                                                                                                                                                                                                                                                                                                                                                                                                                                                                                                                                                                                                                                                                                                                                                                                                                                                                                                                                                                                                                                                                                                                                                                                                                                                                                                                                                                                                                                                                                                                                                                                                                                                                                                                                                                                                                                                                                                                                                                                                                          | 540                                                                                                                                                                                                                                                                                                                                                                                                                                                                                                                                                                                                                                                                                                                                                                                                                                                                                                                                                                                                                                                                                                                                                                                                                                                                                                                                                                                                                                                                                                                                                                                                                                                                                                                                                                                                                                                                       |                   |                     |                        |    |     |     |    |     |     |    |     |     |    |     |     |    |     |     |    |     |     |    |     |     |    |     |     |    |      |      |    |      |      |    |      |      |    |      |      |    |      |      |    |      |      |    |      |      |    |      |      |    |      |      |    |      |      |    |      |      |    |      |      |    |      |      |    |      |      |    |      |      |
| 25                                                                                                                                                                                                                                                                                                                                                                                                                                                                                                                                                                                                                                                                                                                                                                                                                                                                                                                                                                                                                                                                                                                                                                                                                                                                                                                                                                                                                                                                                                                                                                                                                                                                                                                                                                                                                                                                                                                                                                                                                                                                                                                                                                                                                                                                                                                                                                                                                                                                                        | 620                                                                                                                                                                                                                                                                                                                                                                                                                                                                                                                                                                                                                                                                                                                                                                                                                                                                                                                                                                                                                                                                                                                                                                                                                                                                                                                                                                                                                                                                                                                                                                                                                                                                                                                                                                                                                                                                                                                                                                                                                                                                                                                                                                                                                                                                                                                                                                                                                                                                                                                                          | 620                                                                                                                                                                                                                                                                                                                                                                                                                                                                                                                                                                                                                                                                                                                                                                                                                                                                                                                                                                                                                                                                                                                                                                                                                                                                                                                                                                                                                                                                                                                                                                                                                                                                                                                                                                                                                                                                       |                   |                     |                        |    |     |     |    |     |     |    |     |     |    |     |     |    |     |     |    |     |     |    |     |     |    |     |     |    |      |      |    |      |      |    |      |      |    |      |      |    |      |      |    |      |      |    |      |      |    |      |      |    |      |      |    |      |      |    |      |      |    |      |      |    |      |      |    |      |      |    |      |      |
| 26                                                                                                                                                                                                                                                                                                                                                                                                                                                                                                                                                                                                                                                                                                                                                                                                                                                                                                                                                                                                                                                                                                                                                                                                                                                                                                                                                                                                                                                                                                                                                                                                                                                                                                                                                                                                                                                                                                                                                                                                                                                                                                                                                                                                                                                                                                                                                                                                                                                                                        | 720                                                                                                                                                                                                                                                                                                                                                                                                                                                                                                                                                                                                                                                                                                                                                                                                                                                                                                                                                                                                                                                                                                                                                                                                                                                                                                                                                                                                                                                                                                                                                                                                                                                                                                                                                                                                                                                                                                                                                                                                                                                                                                                                                                                                                                                                                                                                                                                                                                                                                                                                          | 680                                                                                                                                                                                                                                                                                                                                                                                                                                                                                                                                                                                                                                                                                                                                                                                                                                                                                                                                                                                                                                                                                                                                                                                                                                                                                                                                                                                                                                                                                                                                                                                                                                                                                                                                                                                                                                                                       |                   |                     |                        |    |     |     |    |     |     |    |     |     |    |     |     |    |     |     |    |     |     |    |     |     |    |     |     |    |      |      |    |      |      |    |      |      |    |      |      |    |      |      |    |      |      |    |      |      |    |      |      |    |      |      |    |      |      |    |      |      |    |      |      |    |      |      |    |      |      |    |      |      |
| 27                                                                                                                                                                                                                                                                                                                                                                                                                                                                                                                                                                                                                                                                                                                                                                                                                                                                                                                                                                                                                                                                                                                                                                                                                                                                                                                                                                                                                                                                                                                                                                                                                                                                                                                                                                                                                                                                                                                                                                                                                                                                                                                                                                                                                                                                                                                                                                                                                                                                                        | 740                                                                                                                                                                                                                                                                                                                                                                                                                                                                                                                                                                                                                                                                                                                                                                                                                                                                                                                                                                                                                                                                                                                                                                                                                                                                                                                                                                                                                                                                                                                                                                                                                                                                                                                                                                                                                                                                                                                                                                                                                                                                                                                                                                                                                                                                                                                                                                                                                                                                                                                                          | 730                                                                                                                                                                                                                                                                                                                                                                                                                                                                                                                                                                                                                                                                                                                                                                                                                                                                                                                                                                                                                                                                                                                                                                                                                                                                                                                                                                                                                                                                                                                                                                                                                                                                                                                                                                                                                                                                       |                   |                     |                        |    |     |     |    |     |     |    |     |     |    |     |     |    |     |     |    |     |     |    |     |     |    |     |     |    |      |      |    |      |      |    |      |      |    |      |      |    |      |      |    |      |      |    |      |      |    |      |      |    |      |      |    |      |      |    |      |      |    |      |      |    |      |      |    |      |      |    |      |      |
| 28                                                                                                                                                                                                                                                                                                                                                                                                                                                                                                                                                                                                                                                                                                                                                                                                                                                                                                                                                                                                                                                                                                                                                                                                                                                                                                                                                                                                                                                                                                                                                                                                                                                                                                                                                                                                                                                                                                                                                                                                                                                                                                                                                                                                                                                                                                                                                                                                                                                                                        | 850                                                                                                                                                                                                                                                                                                                                                                                                                                                                                                                                                                                                                                                                                                                                                                                                                                                                                                                                                                                                                                                                                                                                                                                                                                                                                                                                                                                                                                                                                                                                                                                                                                                                                                                                                                                                                                                                                                                                                                                                                                                                                                                                                                                                                                                                                                                                                                                                                                                                                                                                          | 760                                                                                                                                                                                                                                                                                                                                                                                                                                                                                                                                                                                                                                                                                                                                                                                                                                                                                                                                                                                                                                                                                                                                                                                                                                                                                                                                                                                                                                                                                                                                                                                                                                                                                                                                                                                                                                                                       |                   |                     |                        |    |     |     |    |     |     |    |     |     |    |     |     |    |     |     |    |     |     |    |     |     |    |     |     |    |      |      |    |      |      |    |      |      |    |      |      |    |      |      |    |      |      |    |      |      |    |      |      |    |      |      |    |      |      |    |      |      |    |      |      |    |      |      |    |      |      |    |      |      |
| 29                                                                                                                                                                                                                                                                                                                                                                                                                                                                                                                                                                                                                                                                                                                                                                                                                                                                                                                                                                                                                                                                                                                                                                                                                                                                                                                                                                                                                                                                                                                                                                                                                                                                                                                                                                                                                                                                                                                                                                                                                                                                                                                                                                                                                                                                                                                                                                                                                                                                                        | 950                                                                                                                                                                                                                                                                                                                                                                                                                                                                                                                                                                                                                                                                                                                                                                                                                                                                                                                                                                                                                                                                                                                                                                                                                                                                                                                                                                                                                                                                                                                                                                                                                                                                                                                                                                                                                                                                                                                                                                                                                                                                                                                                                                                                                                                                                                                                                                                                                                                                                                                                          | 890                                                                                                                                                                                                                                                                                                                                                                                                                                                                                                                                                                                                                                                                                                                                                                                                                                                                                                                                                                                                                                                                                                                                                                                                                                                                                                                                                                                                                                                                                                                                                                                                                                                                                                                                                                                                                                                                       |                   |                     |                        |    |     |     |    |     |     |    |     |     |    |     |     |    |     |     |    |     |     |    |     |     |    |     |     |    |      |      |    |      |      |    |      |      |    |      |      |    |      |      |    |      |      |    |      |      |    |      |      |    |      |      |    |      |      |    |      |      |    |      |      |    |      |      |    |      |      |    |      |      |
| 30                                                                                                                                                                                                                                                                                                                                                                                                                                                                                                                                                                                                                                                                                                                                                                                                                                                                                                                                                                                                                                                                                                                                                                                                                                                                                                                                                                                                                                                                                                                                                                                                                                                                                                                                                                                                                                                                                                                                                                                                                                                                                                                                                                                                                                                                                                                                                                                                                                                                                        | 1080                                                                                                                                                                                                                                                                                                                                                                                                                                                                                                                                                                                                                                                                                                                                                                                                                                                                                                                                                                                                                                                                                                                                                                                                                                                                                                                                                                                                                                                                                                                                                                                                                                                                                                                                                                                                                                                                                                                                                                                                                                                                                                                                                                                                                                                                                                                                                                                                                                                                                                                                         | 1045                                                                                                                                                                                                                                                                                                                                                                                                                                                                                                                                                                                                                                                                                                                                                                                                                                                                                                                                                                                                                                                                                                                                                                                                                                                                                                                                                                                                                                                                                                                                                                                                                                                                                                                                                                                                                                                                      |                   |                     |                        |    |     |     |    |     |     |    |     |     |    |     |     |    |     |     |    |     |     |    |     |     |    |     |     |    |      |      |    |      |      |    |      |      |    |      |      |    |      |      |    |      |      |    |      |      |    |      |      |    |      |      |    |      |      |    |      |      |    |      |      |    |      |      |    |      |      |    |      |      |
| 31                                                                                                                                                                                                                                                                                                                                                                                                                                                                                                                                                                                                                                                                                                                                                                                                                                                                                                                                                                                                                                                                                                                                                                                                                                                                                                                                                                                                                                                                                                                                                                                                                                                                                                                                                                                                                                                                                                                                                                                                                                                                                                                                                                                                                                                                                                                                                                                                                                                                                        | 1310                                                                                                                                                                                                                                                                                                                                                                                                                                                                                                                                                                                                                                                                                                                                                                                                                                                                                                                                                                                                                                                                                                                                                                                                                                                                                                                                                                                                                                                                                                                                                                                                                                                                                                                                                                                                                                                                                                                                                                                                                                                                                                                                                                                                                                                                                                                                                                                                                                                                                                                                         | 1140                                                                                                                                                                                                                                                                                                                                                                                                                                                                                                                                                                                                                                                                                                                                                                                                                                                                                                                                                                                                                                                                                                                                                                                                                                                                                                                                                                                                                                                                                                                                                                                                                                                                                                                                                                                                                                                                      |                   |                     |                        |    |     |     |    |     |     |    |     |     |    |     |     |    |     |     |    |     |     |    |     |     |    |     |     |    |      |      |    |      |      |    |      |      |    |      |      |    |      |      |    |      |      |    |      |      |    |      |      |    |      |      |    |      |      |    |      |      |    |      |      |    |      |      |    |      |      |    |      |      |
| 32                                                                                                                                                                                                                                                                                                                                                                                                                                                                                                                                                                                                                                                                                                                                                                                                                                                                                                                                                                                                                                                                                                                                                                                                                                                                                                                                                                                                                                                                                                                                                                                                                                                                                                                                                                                                                                                                                                                                                                                                                                                                                                                                                                                                                                                                                                                                                                                                                                                                                        | 1400                                                                                                                                                                                                                                                                                                                                                                                                                                                                                                                                                                                                                                                                                                                                                                                                                                                                                                                                                                                                                                                                                                                                                                                                                                                                                                                                                                                                                                                                                                                                                                                                                                                                                                                                                                                                                                                                                                                                                                                                                                                                                                                                                                                                                                                                                                                                                                                                                                                                                                                                         | 1340                                                                                                                                                                                                                                                                                                                                                                                                                                                                                                                                                                                                                                                                                                                                                                                                                                                                                                                                                                                                                                                                                                                                                                                                                                                                                                                                                                                                                                                                                                                                                                                                                                                                                                                                                                                                                                                                      |                   |                     |                        |    |     |     |    |     |     |    |     |     |    |     |     |    |     |     |    |     |     |    |     |     |    |     |     |    |      |      |    |      |      |    |      |      |    |      |      |    |      |      |    |      |      |    |      |      |    |      |      |    |      |      |    |      |      |    |      |      |    |      |      |    |      |      |    |      |      |    |      |      |
| 33                                                                                                                                                                                                                                                                                                                                                                                                                                                                                                                                                                                                                                                                                                                                                                                                                                                                                                                                                                                                                                                                                                                                                                                                                                                                                                                                                                                                                                                                                                                                                                                                                                                                                                                                                                                                                                                                                                                                                                                                                                                                                                                                                                                                                                                                                                                                                                                                                                                                                        | 1640                                                                                                                                                                                                                                                                                                                                                                                                                                                                                                                                                                                                                                                                                                                                                                                                                                                                                                                                                                                                                                                                                                                                                                                                                                                                                                                                                                                                                                                                                                                                                                                                                                                                                                                                                                                                                                                                                                                                                                                                                                                                                                                                                                                                                                                                                                                                                                                                                                                                                                                                         | 1520                                                                                                                                                                                                                                                                                                                                                                                                                                                                                                                                                                                                                                                                                                                                                                                                                                                                                                                                                                                                                                                                                                                                                                                                                                                                                                                                                                                                                                                                                                                                                                                                                                                                                                                                                                                                                                                                      |                   |                     |                        |    |     |     |    |     |     |    |     |     |    |     |     |    |     |     |    |     |     |    |     |     |    |     |     |    |      |      |    |      |      |    |      |      |    |      |      |    |      |      |    |      |      |    |      |      |    |      |      |    |      |      |    |      |      |    |      |      |    |      |      |    |      |      |    |      |      |    |      |      |
| 34                                                                                                                                                                                                                                                                                                                                                                                                                                                                                                                                                                                                                                                                                                                                                                                                                                                                                                                                                                                                                                                                                                                                                                                                                                                                                                                                                                                                                                                                                                                                                                                                                                                                                                                                                                                                                                                                                                                                                                                                                                                                                                                                                                                                                                                                                                                                                                                                                                                                                        | 1840                                                                                                                                                                                                                                                                                                                                                                                                                                                                                                                                                                                                                                                                                                                                                                                                                                                                                                                                                                                                                                                                                                                                                                                                                                                                                                                                                                                                                                                                                                                                                                                                                                                                                                                                                                                                                                                                                                                                                                                                                                                                                                                                                                                                                                                                                                                                                                                                                                                                                                                                         | 1760                                                                                                                                                                                                                                                                                                                                                                                                                                                                                                                                                                                                                                                                                                                                                                                                                                                                                                                                                                                                                                                                                                                                                                                                                                                                                                                                                                                                                                                                                                                                                                                                                                                                                                                                                                                                                                                                      |                   |                     |                        |    |     |     |    |     |     |    |     |     |    |     |     |    |     |     |    |     |     |    |     |     |    |     |     |    |      |      |    |      |      |    |      |      |    |      |      |    |      |      |    |      |      |    |      |      |    |      |      |    |      |      |    |      |      |    |      |      |    |      |      |    |      |      |    |      |      |    |      |      |
| 35                                                                                                                                                                                                                                                                                                                                                                                                                                                                                                                                                                                                                                                                                                                                                                                                                                                                                                                                                                                                                                                                                                                                                                                                                                                                                                                                                                                                                                                                                                                                                                                                                                                                                                                                                                                                                                                                                                                                                                                                                                                                                                                                                                                                                                                                                                                                                                                                                                                                                        | 2110                                                                                                                                                                                                                                                                                                                                                                                                                                                                                                                                                                                                                                                                                                                                                                                                                                                                                                                                                                                                                                                                                                                                                                                                                                                                                                                                                                                                                                                                                                                                                                                                                                                                                                                                                                                                                                                                                                                                                                                                                                                                                                                                                                                                                                                                                                                                                                                                                                                                                                                                         | 2030                                                                                                                                                                                                                                                                                                                                                                                                                                                                                                                                                                                                                                                                                                                                                                                                                                                                                                                                                                                                                                                                                                                                                                                                                                                                                                                                                                                                                                                                                                                                                                                                                                                                                                                                                                                                                                                                      |                   |                     |                        |    |     |     |    |     |     |    |     |     |    |     |     |    |     |     |    |     |     |    |     |     |    |     |     |    |      |      |    |      |      |    |      |      |    |      |      |    |      |      |    |      |      |    |      |      |    |      |      |    |      |      |    |      |      |    |      |      |    |      |      |    |      |      |    |      |      |    |      |      |
| 36                                                                                                                                                                                                                                                                                                                                                                                                                                                                                                                                                                                                                                                                                                                                                                                                                                                                                                                                                                                                                                                                                                                                                                                                                                                                                                                                                                                                                                                                                                                                                                                                                                                                                                                                                                                                                                                                                                                                                                                                                                                                                                                                                                                                                                                                                                                                                                                                                                                                                        | 2320                                                                                                                                                                                                                                                                                                                                                                                                                                                                                                                                                                                                                                                                                                                                                                                                                                                                                                                                                                                                                                                                                                                                                                                                                                                                                                                                                                                                                                                                                                                                                                                                                                                                                                                                                                                                                                                                                                                                                                                                                                                                                                                                                                                                                                                                                                                                                                                                                                                                                                                                         | 2220                                                                                                                                                                                                                                                                                                                                                                                                                                                                                                                                                                                                                                                                                                                                                                                                                                                                                                                                                                                                                                                                                                                                                                                                                                                                                                                                                                                                                                                                                                                                                                                                                                                                                                                                                                                                                                                                      |                   |                     |                        |    |     |     |    |     |     |    |     |     |    |     |     |    |     |     |    |     |     |    |     |     |    |     |     |    |      |      |    |      |      |    |      |      |    |      |      |    |      |      |    |      |      |    |      |      |    |      |      |    |      |      |    |      |      |    |      |      |    |      |      |    |      |      |    |      |      |    |      |      |
| 37                                                                                                                                                                                                                                                                                                                                                                                                                                                                                                                                                                                                                                                                                                                                                                                                                                                                                                                                                                                                                                                                                                                                                                                                                                                                                                                                                                                                                                                                                                                                                                                                                                                                                                                                                                                                                                                                                                                                                                                                                                                                                                                                                                                                                                                                                                                                                                                                                                                                                        | 2550                                                                                                                                                                                                                                                                                                                                                                                                                                                                                                                                                                                                                                                                                                                                                                                                                                                                                                                                                                                                                                                                                                                                                                                                                                                                                                                                                                                                                                                                                                                                                                                                                                                                                                                                                                                                                                                                                                                                                                                                                                                                                                                                                                                                                                                                                                                                                                                                                                                                                                                                         | 2430                                                                                                                                                                                                                                                                                                                                                                                                                                                                                                                                                                                                                                                                                                                                                                                                                                                                                                                                                                                                                                                                                                                                                                                                                                                                                                                                                                                                                                                                                                                                                                                                                                                                                                                                                                                                                                                                      |                   |                     |                        |    |     |     |    |     |     |    |     |     |    |     |     |    |     |     |    |     |     |    |     |     |    |     |     |    |      |      |    |      |      |    |      |      |    |      |      |    |      |      |    |      |      |    |      |      |    |      |      |    |      |      |    |      |      |    |      |      |    |      |      |    |      |      |    |      |      |    |      |      |
| 38                                                                                                                                                                                                                                                                                                                                                                                                                                                                                                                                                                                                                                                                                                                                                                                                                                                                                                                                                                                                                                                                                                                                                                                                                                                                                                                                                                                                                                                                                                                                                                                                                                                                                                                                                                                                                                                                                                                                                                                                                                                                                                                                                                                                                                                                                                                                                                                                                                                                                        | 2780                                                                                                                                                                                                                                                                                                                                                                                                                                                                                                                                                                                                                                                                                                                                                                                                                                                                                                                                                                                                                                                                                                                                                                                                                                                                                                                                                                                                                                                                                                                                                                                                                                                                                                                                                                                                                                                                                                                                                                                                                                                                                                                                                                                                                                                                                                                                                                                                                                                                                                                                         | 2660                                                                                                                                                                                                                                                                                                                                                                                                                                                                                                                                                                                                                                                                                                                                                                                                                                                                                                                                                                                                                                                                                                                                                                                                                                                                                                                                                                                                                                                                                                                                                                                                                                                                                                                                                                                                                                                                      |                   |                     |                        |    |     |     |    |     |     |    |     |     |    |     |     |    |     |     |    |     |     |    |     |     |    |     |     |    |      |      |    |      |      |    |      |      |    |      |      |    |      |      |    |      |      |    |      |      |    |      |      |    |      |      |    |      |      |    |      |      |    |      |      |    |      |      |    |      |      |    |      |      |
| 39                                                                                                                                                                                                                                                                                                                                                                                                                                                                                                                                                                                                                                                                                                                                                                                                                                                                                                                                                                                                                                                                                                                                                                                                                                                                                                                                                                                                                                                                                                                                                                                                                                                                                                                                                                                                                                                                                                                                                                                                                                                                                                                                                                                                                                                                                                                                                                                                                                                                                        | 2940                                                                                                                                                                                                                                                                                                                                                                                                                                                                                                                                                                                                                                                                                                                                                                                                                                                                                                                                                                                                                                                                                                                                                                                                                                                                                                                                                                                                                                                                                                                                                                                                                                                                                                                                                                                                                                                                                                                                                                                                                                                                                                                                                                                                                                                                                                                                                                                                                                                                                                                                         | 2820                                                                                                                                                                                                                                                                                                                                                                                                                                                                                                                                                                                                                                                                                                                                                                                                                                                                                                                                                                                                                                                                                                                                                                                                                                                                                                                                                                                                                                                                                                                                                                                                                                                                                                                                                                                                                                                                      |                   |                     |                        |    |     |     |    |     |     |    |     |     |    |     |     |    |     |     |    |     |     |    |     |     |    |     |     |    |      |      |    |      |      |    |      |      |    |      |      |    |      |      |    |      |      |    |      |      |    |      |      |    |      |      |    |      |      |    |      |      |    |      |      |    |      |      |    |      |      |    |      |      |
| 40                                                                                                                                                                                                                                                                                                                                                                                                                                                                                                                                                                                                                                                                                                                                                                                                                                                                                                                                                                                                                                                                                                                                                                                                                                                                                                                                                                                                                                                                                                                                                                                                                                                                                                                                                                                                                                                                                                                                                                                                                                                                                                                                                                                                                                                                                                                                                                                                                                                                                        | 3070                                                                                                                                                                                                                                                                                                                                                                                                                                                                                                                                                                                                                                                                                                                                                                                                                                                                                                                                                                                                                                                                                                                                                                                                                                                                                                                                                                                                                                                                                                                                                                                                                                                                                                                                                                                                                                                                                                                                                                                                                                                                                                                                                                                                                                                                                                                                                                                                                                                                                                                                         | 2950                                                                                                                                                                                                                                                                                                                                                                                                                                                                                                                                                                                                                                                                                                                                                                                                                                                                                                                                                                                                                                                                                                                                                                                                                                                                                                                                                                                                                                                                                                                                                                                                                                                                                                                                                                                                                                                                      |                   |                     |                        |    |     |     |    |     |     |    |     |     |    |     |     |    |     |     |    |     |     |    |     |     |    |     |     |    |      |      |    |      |      |    |      |      |    |      |      |    |      |      |    |      |      |    |      |      |    |      |      |    |      |      |    |      |      |    |      |      |    |      |      |    |      |      |    |      |      |    |      |      |
| 41                                                                                                                                                                                                                                                                                                                                                                                                                                                                                                                                                                                                                                                                                                                                                                                                                                                                                                                                                                                                                                                                                                                                                                                                                                                                                                                                                                                                                                                                                                                                                                                                                                                                                                                                                                                                                                                                                                                                                                                                                                                                                                                                                                                                                                                                                                                                                                                                                                                                                        | 3180                                                                                                                                                                                                                                                                                                                                                                                                                                                                                                                                                                                                                                                                                                                                                                                                                                                                                                                                                                                                                                                                                                                                                                                                                                                                                                                                                                                                                                                                                                                                                                                                                                                                                                                                                                                                                                                                                                                                                                                                                                                                                                                                                                                                                                                                                                                                                                                                                                                                                                                                         | 3050                                                                                                                                                                                                                                                                                                                                                                                                                                                                                                                                                                                                                                                                                                                                                                                                                                                                                                                                                                                                                                                                                                                                                                                                                                                                                                                                                                                                                                                                                                                                                                                                                                                                                                                                                                                                                                                                      |                   |                     |                        |    |     |     |    |     |     |    |     |     |    |     |     |    |     |     |    |     |     |    |     |     |    |     |     |    |      |      |    |      |      |    |      |      |    |      |      |    |      |      |    |      |      |    |      |      |    |      |      |    |      |      |    |      |      |    |      |      |    |      |      |    |      |      |    |      |      |    |      |      |
| 42                                                                                                                                                                                                                                                                                                                                                                                                                                                                                                                                                                                                                                                                                                                                                                                                                                                                                                                                                                                                                                                                                                                                                                                                                                                                                                                                                                                                                                                                                                                                                                                                                                                                                                                                                                                                                                                                                                                                                                                                                                                                                                                                                                                                                                                                                                                                                                                                                                                                                        | 3210                                                                                                                                                                                                                                                                                                                                                                                                                                                                                                                                                                                                                                                                                                                                                                                                                                                                                                                                                                                                                                                                                                                                                                                                                                                                                                                                                                                                                                                                                                                                                                                                                                                                                                                                                                                                                                                                                                                                                                                                                                                                                                                                                                                                                                                                                                                                                                                                                                                                                                                                         | 3080                                                                                                                                                                                                                                                                                                                                                                                                                                                                                                                                                                                                                                                                                                                                                                                                                                                                                                                                                                                                                                                                                                                                                                                                                                                                                                                                                                                                                                                                                                                                                                                                                                                                                                                                                                                                                                                                      |                   |                     |                        |    |     |     |    |     |     |    |     |     |    |     |     |    |     |     |    |     |     |    |     |     |    |     |     |    |      |      |    |      |      |    |      |      |    |      |      |    |      |      |    |      |      |    |      |      |    |      |      |    |      |      |    |      |      |    |      |      |    |      |      |    |      |      |    |      |      |    |      |      |
| 43                                                                                                                                                                                                                                                                                                                                                                                                                                                                                                                                                                                                                                                                                                                                                                                                                                                                                                                                                                                                                                                                                                                                                                                                                                                                                                                                                                                                                                                                                                                                                                                                                                                                                                                                                                                                                                                                                                                                                                                                                                                                                                                                                                                                                                                                                                                                                                                                                                                                                        | 3080                                                                                                                                                                                                                                                                                                                                                                                                                                                                                                                                                                                                                                                                                                                                                                                                                                                                                                                                                                                                                                                                                                                                                                                                                                                                                                                                                                                                                                                                                                                                                                                                                                                                                                                                                                                                                                                                                                                                                                                                                                                                                                                                                                                                                                                                                                                                                                                                                                                                                                                                         | 2950                                                                                                                                                                                                                                                                                                                                                                                                                                                                                                                                                                                                                                                                                                                                                                                                                                                                                                                                                                                                                                                                                                                                                                                                                                                                                                                                                                                                                                                                                                                                                                                                                                                                                                                                                                                                                                                                      |                   |                     |                        |    |     |     |    |     |     |    |     |     |    |     |     |    |     |     |    |     |     |    |     |     |    |     |     |    |      |      |    |      |      |    |      |      |    |      |      |    |      |      |    |      |      |    |      |      |    |      |      |    |      |      |    |      |      |    |      |      |    |      |      |    |      |      |    |      |      |    |      |      |
| 44                                                                                                                                                                                                                                                                                                                                                                                                                                                                                                                                                                                                                                                                                                                                                                                                                                                                                                                                                                                                                                                                                                                                                                                                                                                                                                                                                                                                                                                                                                                                                                                                                                                                                                                                                                                                                                                                                                                                                                                                                                                                                                                                                                                                                                                                                                                                                                                                                                                                                        | 3050                                                                                                                                                                                                                                                                                                                                                                                                                                                                                                                                                                                                                                                                                                                                                                                                                                                                                                                                                                                                                                                                                                                                                                                                                                                                                                                                                                                                                                                                                                                                                                                                                                                                                                                                                                                                                                                                                                                                                                                                                                                                                                                                                                                                                                                                                                                                                                                                                                                                                                                                         | 2930                                                                                                                                                                                                                                                                                                                                                                                                                                                                                                                                                                                                                                                                                                                                                                                                                                                                                                                                                                                                                                                                                                                                                                                                                                                                                                                                                                                                                                                                                                                                                                                                                                                                                                                                                                                                                                                                      |                   |                     |                        |    |     |     |    |     |     |    |     |     |    |     |     |    |     |     |    |     |     |    |     |     |    |     |     |    |      |      |    |      |      |    |      |      |    |      |      |    |      |      |    |      |      |    |      |      |    |      |      |    |      |      |    |      |      |    |      |      |    |      |      |    |      |      |    |      |      |    |      |      |

# Australia and New Zealand Antecedent Classification of Perinatal Mortality

|                                                                                                                                                                                                                                                                                                                                                                                                                                                                                                                                                                                                                                                                                                                                                                                                                                                                                                                                                                                                                                                                                                                                                                                                                                                                                                                                                                                                                                                                                                                                                                                                                                                                                                                                                                                                                                                                                                                                                                                                                                                                                                                                                                                                                                                                                                                                                                                                                                                                                                                                                                                                                          |                                                                                                                                                                                                                                                                                                                                                                                                                                                                                                                                                                                                                                                                                                                                                                                                                                                                                                                                                                                                                                                                                                                                                                                                                                                                                                                                                                                                                                                                                                                                                                                                                                                                                                                                                                                                                                                                                                                                                                                                                                                                                                                                                                                                                                                                                                                                                                                                                                                                                                                                                                                                                                                                                                                                                                                                                                                                                                                                     |
|--------------------------------------------------------------------------------------------------------------------------------------------------------------------------------------------------------------------------------------------------------------------------------------------------------------------------------------------------------------------------------------------------------------------------------------------------------------------------------------------------------------------------------------------------------------------------------------------------------------------------------------------------------------------------------------------------------------------------------------------------------------------------------------------------------------------------------------------------------------------------------------------------------------------------------------------------------------------------------------------------------------------------------------------------------------------------------------------------------------------------------------------------------------------------------------------------------------------------------------------------------------------------------------------------------------------------------------------------------------------------------------------------------------------------------------------------------------------------------------------------------------------------------------------------------------------------------------------------------------------------------------------------------------------------------------------------------------------------------------------------------------------------------------------------------------------------------------------------------------------------------------------------------------------------------------------------------------------------------------------------------------------------------------------------------------------------------------------------------------------------------------------------------------------------------------------------------------------------------------------------------------------------------------------------------------------------------------------------------------------------------------------------------------------------------------------------------------------------------------------------------------------------------------------------------------------------------------------------------------------------|-------------------------------------------------------------------------------------------------------------------------------------------------------------------------------------------------------------------------------------------------------------------------------------------------------------------------------------------------------------------------------------------------------------------------------------------------------------------------------------------------------------------------------------------------------------------------------------------------------------------------------------------------------------------------------------------------------------------------------------------------------------------------------------------------------------------------------------------------------------------------------------------------------------------------------------------------------------------------------------------------------------------------------------------------------------------------------------------------------------------------------------------------------------------------------------------------------------------------------------------------------------------------------------------------------------------------------------------------------------------------------------------------------------------------------------------------------------------------------------------------------------------------------------------------------------------------------------------------------------------------------------------------------------------------------------------------------------------------------------------------------------------------------------------------------------------------------------------------------------------------------------------------------------------------------------------------------------------------------------------------------------------------------------------------------------------------------------------------------------------------------------------------------------------------------------------------------------------------------------------------------------------------------------------------------------------------------------------------------------------------------------------------------------------------------------------------------------------------------------------------------------------------------------------------------------------------------------------------------------------------------------------------------------------------------------------------------------------------------------------------------------------------------------------------------------------------------------------------------------------------------------------------------------------------------------|
| <p><b>1. Congenital abnormality</b><br/>(including termination of pregnancy for congenital abnormality)</p> <ul style="list-style-type: none"> <li>1.1 Central nervous system</li> <li>1.2 Cardiovascular system</li> <li>1.3 Urinary tract</li> <li>1.4 Gastrointestinal tract</li> <li>1.5 Chromosomal</li> <li>1.6 Metabolic</li> <li>1.7 Multiple</li> <li>1.8 Other</li> <li>1.9 Unspecified</li> </ul> <p><b>2. Perinatal infection</b></p> <ul style="list-style-type: none"> <li>2.1 Bacterial <ul style="list-style-type: none"> <li>2.11 Group B Streptococcus</li> <li>2.12 E Coli</li> <li>2.13 Listeria Monocytogenes</li> <li>2.18 Other bacterial</li> <li>2.19 Unspecified bacterial</li> </ul> </li> <li>2.2 Viral <ul style="list-style-type: none"> <li>2.21 Cytomegalovirus</li> <li>2.22 Parvovirus</li> <li>2.23 Herpes simplex virus</li> <li>2.24 Rubella virus</li> <li>2.28 Other viral</li> <li>2.29 Unspecified viral</li> </ul> </li> <li>2.3 Protozoal eg Toxoplasma</li> <li>2.4 Spirochaetal eg Syphilis</li> <li>2.5 Fungal</li> <li>2.6 Other</li> <li>2.7 Unspecified organism</li> </ul> <p><b>3. Hypertension</b></p> <ul style="list-style-type: none"> <li>3.1 Chronic hypertension: essential</li> <li>3.2 Chronic hypertension: secondary eg renal disease</li> <li>3.3 Chronic hypertension: unspecified</li> <li>3.4 Gestational hypertension</li> <li>3.5 Pre-eclampsia</li> <li>3.6 Pre-eclampsia superimposed on pre-existing hypertension</li> <li>3.7 Unspecified hypertension</li> </ul> <p><b>4. Antepartum haemorrhage</b></p> <ul style="list-style-type: none"> <li>4.1 Placental abruption</li> <li>4.2 Placenta praevia</li> <li>4.3 Vasa praevia</li> <li>4.8 Other APH</li> <li>4.9 APH of undetermined origin</li> </ul> <p><b>5. Maternal disease</b></p> <ul style="list-style-type: none"> <li>5.1 Termination of pregnancy (other than for fetal abnormality)</li> <li>5.2 Diabetes / gestational diabetes</li> <li>5.3 Maternal injury <ul style="list-style-type: none"> <li>5.31 Accidental</li> <li>5.32 Non-accidental</li> </ul> </li> <li>5.4 Maternal sepsis</li> <li>5.5 Other maternal conditions eg Lupus obstetric syndrome</li> </ul> <p><b>6. Specific perinatal conditions</b></p> <ul style="list-style-type: none"> <li>6.1 Twin-to-twin transfusion</li> <li>6.2 Fetomaternal haemorrhage</li> <li>6.3 Antepartum cord complications</li> <li>6.4 Uterine abnormality</li> <li>6.5 Birth trauma (typically &gt;24 weeks or &gt; 600 grams)</li> <li>6.6 Haemolytic disease</li> <li>6.7 Idiopathic hydrops</li> <li>6.8 Other</li> </ul> | <p><b>7. Hypoxic peripartum death (typically &gt; 24 weeks or &gt; 600 grams)</b></p> <ul style="list-style-type: none"> <li>7.1 With intrapartum complications <ul style="list-style-type: none"> <li>7.11 Uterine rupture</li> <li>7.12 Cord prolapse</li> <li>7.13 Shoulder dystocia</li> <li>7.18 Other</li> </ul> </li> <li>7.2 No intrapartum complications</li> <li>7.9 Unspecified hypoxic peripartum death</li> </ul> <p><b>8. Fetal growth restriction (FGR)</b></p> <ul style="list-style-type: none"> <li>8.1 With evidence of uteroplacental insufficiency eg significant infarction, acute atherosclerosis, maternal vascular thrombosis or maternal floor infarction</li> <li>8.2 With chronic villitis</li> <li>8.3 Without the above placental pathology</li> <li>8.4 No examination of placenta</li> <li>8.9 Unspecified FGR or not known whether placenta examined</li> </ul> <p><b>9. Spontaneous preterm</b></p> <ul style="list-style-type: none"> <li>9.1 Spontaneous preterm with intact membranes, or membrane rupture less than 24 hours before delivery, <ul style="list-style-type: none"> <li>9.11 with chorioamnionitis</li> <li>9.12 without chorioamnionitis</li> <li>9.13 no examination of the placenta</li> <li>9.19 unspecified or not known whether placenta examined</li> </ul> </li> <li>9.2 Spontaneous preterm with membrane rupture <math>\geq</math> 24 hours before delivery, <ul style="list-style-type: none"> <li>9.21 with chorioamnionitis</li> <li>9.22 without chorioamnionitis</li> <li>9.23 no examination of the placenta</li> <li>9.29 unspecified or not known whether placenta examined</li> </ul> </li> <li>9.3 Spontaneous preterm with membrane rupture of unknown duration before delivery, <ul style="list-style-type: none"> <li>9.31 with chorioamnionitis</li> <li>9.32 without chorioamnionitis</li> <li>9.33 no examination of the placenta</li> <li>9.39 unspecified or not known whether placenta examined</li> </ul> </li> </ul> <p><b>10. Unexplained antepartum death</b></p> <ul style="list-style-type: none"> <li>10.1 With evidence of uteroplacental insufficiency eg significant infarction, acute atherosclerosis, maternal vascular thrombosis or maternal floor infarction.</li> <li>10.2 With chronic villitis</li> <li>10.3 Without the above placental pathology</li> <li>10.4 No examination of placenta</li> <li>10.9 Unspecified unexplained antepartum death or not known whether placenta examined.</li> </ul> <p><b>11. No obstetric antecedent</b></p> <ul style="list-style-type: none"> <li>11.1 SIDS <ul style="list-style-type: none"> <li>11.11 Consistent with SIDS</li> <li>11.12 Possible SIDS</li> </ul> </li> <li>11.2 Postnatally acquired infection</li> <li>11.3 Accidental asphyxiation</li> <li>11.4 Other accident, poisoning or violence (postnatal)</li> <li>11.8 Other</li> <li>11.9 Unknown / Unexplained</li> </ul> |
|--------------------------------------------------------------------------------------------------------------------------------------------------------------------------------------------------------------------------------------------------------------------------------------------------------------------------------------------------------------------------------------------------------------------------------------------------------------------------------------------------------------------------------------------------------------------------------------------------------------------------------------------------------------------------------------------------------------------------------------------------------------------------------------------------------------------------------------------------------------------------------------------------------------------------------------------------------------------------------------------------------------------------------------------------------------------------------------------------------------------------------------------------------------------------------------------------------------------------------------------------------------------------------------------------------------------------------------------------------------------------------------------------------------------------------------------------------------------------------------------------------------------------------------------------------------------------------------------------------------------------------------------------------------------------------------------------------------------------------------------------------------------------------------------------------------------------------------------------------------------------------------------------------------------------------------------------------------------------------------------------------------------------------------------------------------------------------------------------------------------------------------------------------------------------------------------------------------------------------------------------------------------------------------------------------------------------------------------------------------------------------------------------------------------------------------------------------------------------------------------------------------------------------------------------------------------------------------------------------------------------|-------------------------------------------------------------------------------------------------------------------------------------------------------------------------------------------------------------------------------------------------------------------------------------------------------------------------------------------------------------------------------------------------------------------------------------------------------------------------------------------------------------------------------------------------------------------------------------------------------------------------------------------------------------------------------------------------------------------------------------------------------------------------------------------------------------------------------------------------------------------------------------------------------------------------------------------------------------------------------------------------------------------------------------------------------------------------------------------------------------------------------------------------------------------------------------------------------------------------------------------------------------------------------------------------------------------------------------------------------------------------------------------------------------------------------------------------------------------------------------------------------------------------------------------------------------------------------------------------------------------------------------------------------------------------------------------------------------------------------------------------------------------------------------------------------------------------------------------------------------------------------------------------------------------------------------------------------------------------------------------------------------------------------------------------------------------------------------------------------------------------------------------------------------------------------------------------------------------------------------------------------------------------------------------------------------------------------------------------------------------------------------------------------------------------------------------------------------------------------------------------------------------------------------------------------------------------------------------------------------------------------------------------------------------------------------------------------------------------------------------------------------------------------------------------------------------------------------------------------------------------------------------------------------------------------------|
